# Supplementary material
Source: publisher figshare collection journal article supplement (https://acs.figshare.com/ndownloader/files/4721971)
Supplement: Supplementary file 1 [file 4721971]

 
data_sad 
 
_audit_creation_method            SHELXL-97 
_chemical_name_systematic 
; 
 ? 
; 
_chemical_name_common             ? 
_chemical_melting_point           ? 
_chemical_formula_moiety          ? 
_chemical_formula_sum 
 'C68 H64 Hg N16 O19' 
_chemical_formula_weight          1609.94 
 
loop_ 
 _atom_type_symbol 
 _atom_type_description 
 _atom_type_scat_dispersion_real 
 _atom_type_scat_dispersion_imag 
 _atom_type_scat_source 
 'C'  'C'   0.0033   0.0016 
 'International Tables Vol C Tables 4.2.6.8 and 6.1.1.4' 
 'H'  'H'   0.0000   0.0000 
 'International Tables Vol C Tables 4.2.6.8 and 6.1.1.4' 
 'N'  'N'   0.0061   0.0033 
 'International Tables Vol C Tables 4.2.6.8 and 6.1.1.4' 
 'O'  'O'   0.0106   0.0060 
 'International Tables Vol C Tables 4.2.6.8 and 6.1.1.4' 
 'Hg'  'Hg'  -2.3894   9.2266 
 'International Tables Vol C Tables 4.2.6.8 and 6.1.1.4' 
 
_symmetry_cell_setting           'Triclinic'
_symmetry_space_group_name_H-M   'P-1   '
 
loop_ 
 _symmetry_equiv_pos_as_xyz 
 'x, y, z' 
 '-x, -y, -z' 
 
_cell_length_a                    15.057(6) 
_cell_length_b                    15.887(6) 
_cell_length_c                    18.534(7) 
_cell_angle_alpha                 74.932(5) 
_cell_angle_beta                  70.676(6) 
_cell_angle_gamma                 71.248(5) 
_cell_volume                      3903(3) 
_cell_formula_units_Z             2 
_cell_measurement_temperature     293(2) 
_cell_measurement_reflns_used     ? 
_cell_measurement_theta_min       ? 
_cell_measurement_theta_max       ? 
 
_exptl_crystal_description        block 
_exptl_crystal_colour             red 
_exptl_crystal_size_max           0.30 
_exptl_crystal_size_mid           0.25 
_exptl_crystal_size_min           0.25 
_exptl_crystal_density_meas       ? 
_exptl_crystal_density_diffrn     1.370 
_exptl_crystal_density_method     'not measured' 
_exptl_crystal_F_000              1632 
_exptl_absorpt_coefficient_mu     2.048 
_exptl_absorpt_correction_type    empirical 
_exptl_absorpt_correction_T_min   0.3224
_exptl_absorpt_correction_T_max   0.6627 
_exptl_absorpt_process_details    sadabs 
 
_exptl_special_details 
; 
 ? 
; 
 
_diffrn_ambient_temperature       293(2) 
_diffrn_radiation_wavelength      0.71073 
_diffrn_radiation_type            MoK\a 
_diffrn_radiation_source          'fine-focus sealed tube' 
_diffrn_radiation_monochromator   graphite 
diffrn_measurement_device_type  'CCD area detector'
_diffrn_measurement_method       'phi and omega scans'
_diffrn_reflns_number             19505 
_diffrn_reflns_av_R_equivalents   0.1246 
_diffrn_reflns_av_sigmaI/netI     0.2256 
_diffrn_reflns_limit_h_min        -17 
_diffrn_reflns_limit_h_max        17 
_diffrn_reflns_limit_k_min        -18 
_diffrn_reflns_limit_k_max        18 
_diffrn_reflns_limit_l_min        -17 
_diffrn_reflns_limit_l_max        21 
_diffrn_reflns_theta_min          1.63 
_diffrn_reflns_theta_max          25.00 
_reflns_number_total              13494 
_reflns_number_gt                 5701 
_reflns_threshold_expression      >2sigma(I) 
 
_computing_data_collection      'Bruker SMART'
_computing_cell_refinement      'Bruker SMART'
_computing_data_reduction       'Bruker SAINT'
_computing_structure_solution   'Bruker SHELXTL'
_computing_structure_refinement 'Bruker SHELXTL'
_computing_molecular_graphics   'Bruker SHELXTL'
_computing_publication_material 'Bruker SHELXTL'

_refine_special_details 
; 
 Refinement of F^2^ against ALL reflections.  The weighted R-factor wR and 
 goodness of fit S are based on F^2^, conventional R-factors R are based 
 on F, with F set to zero for negative F^2^. The threshold expression of 
 F^2^ > 2sigma(F^2^) is used only for calculating R-factors(gt) etc. and is 
 not relevant to the choice of reflections for refinement.  R-factors based 
 on F^2^ are statistically about twice as large as those based on F, and R- 
 factors based on ALL data will be even larger. 
; 
 
_refine_ls_structure_factor_coef  Fsqd  
_refine_ls_matrix_type            full 
_refine_ls_weighting_scheme       calc  
_refine_ls_weighting_details 
 'calc w=1/[\s^2^(Fo^2^)+(0.0802P)^2^+0.0000P] where P=(Fo^2^+2Fc^2^)/3' 
_atom_sites_solution_primary      direct 
_atom_sites_solution_secondary    difmap 
_atom_sites_solution_hydrogens    geom 
_refine_ls_hydrogen_treatment     mixed 
_refine_ls_extinction_method      none 
_refine_ls_extinction_coef        ? 
_refine_ls_number_reflns          13494 
_refine_ls_number_parameters      938 
_refine_ls_number_restraints      1 
_refine_ls_R_factor_all           0.1692 
_refine_ls_R_factor_gt            0.0768 
_refine_ls_wR_factor_ref          0.1890 
_refine_ls_wR_factor_gt           0.1670 
_refine_ls_goodness_of_fit_ref    0.818 
_refine_ls_restrained_S_all       0.818 
_refine_ls_shift/su_max           0.113 
_refine_ls_shift/su_mean          0.003 
 
loop_ 
 _atom_site_label 
 _atom_site_type_symbol 
 _atom_site_fract_x 
 _atom_site_fract_y 
 _atom_site_fract_z 
 _atom_site_U_iso_or_equiv 
 _atom_site_adp_type 
 _atom_site_occupancy 
 _atom_site_symmetry_multiplicity 
 _atom_site_calc_flag 
 _atom_site_refinement_flags 
 _atom_site_disorder_assembly 
 _atom_site_disorder_group 
Hg1 Hg -0.03812(4) -0.07278(3) 0.21145(3) 0.06068(19) Uani 1 1 d . . . 
C1 C 0.1902(10) -0.0964(8) 0.1547(7) 0.077(4) Uani 1 1 d . . . 
H1A H 0.1729 -0.0391 0.1262 0.093 Uiso 1 1 calc R . . 
C2 C 0.2877(10) -0.1396(10) 0.1472(8) 0.086(4) Uani 1 1 d . . . 
H2A H 0.3348 -0.1104 0.1145 0.104 Uiso 1 1 calc R . . 
C3 C 0.3167(10) -0.2268(10) 0.1882(8) 0.088(4) Uani 1 1 d . . . 
H3A H 0.3818 -0.2567 0.1845 0.105 Uiso 1 1 calc R . . 
C4 C 0.2405(11) -0.2657(9) 0.2352(8) 0.082(4) Uani 1 1 d . . . 
H4A H 0.2550 -0.3236 0.2636 0.098 Uiso 1 1 calc R . . 
C5 C 0.1454(9) -0.2198(8) 0.2399(6) 0.052(3) Uani 1 1 d . . . 
C6 C 0.0712(9) -0.2609(7) 0.2883(6) 0.064(3) Uani 1 1 d . . . 
H6A H 0.0867 -0.3156 0.3210 0.077 Uiso 1 1 calc R . . 
C7 C -0.1868(9) -0.2089(6) 0.3268(6) 0.052(3) Uani 1 1 d . . . 
C8 C -0.2668(8) -0.2504(6) 0.3831(6) 0.052(3) Uani 1 1 d . . . 
C9 C -0.2492(9) -0.3446(7) 0.3953(7) 0.073(3) Uani 1 1 d . . . 
H9A H -0.1892 -0.3787 0.3701 0.087 Uiso 1 1 calc R . . 
C10 C -0.3181(9) -0.3871(7) 0.4432(7) 0.066(3) Uani 1 1 d . . . 
H10A H -0.3054 -0.4496 0.4506 0.079 Uiso 1 1 calc R . . 
C11 C -0.4050(10) -0.3376(8) 0.4799(7) 0.071(3) Uani 1 1 d . . . 
H11A H -0.4520 -0.3664 0.5133 0.085 Uiso 1 1 calc R . . 
C12 C -0.4252(8) -0.2437(7) 0.4685(6) 0.061(3) Uani 1 1 d . . . 
H12A H -0.4857 -0.2107 0.4940 0.073 Uiso 1 1 calc R . . 
C13 C -0.3564(8) -0.1990(6) 0.4196(6) 0.049(3) Uani 1 1 d . . . 
C14 C -0.3796(7) -0.0992(6) 0.4131(6) 0.049(3) Uani 1 1 d . . . 
C15 C -0.3290(7) -0.0627(7) 0.4441(5) 0.049(3) Uani 1 1 d . . . 
C16 C -0.2524(8) -0.1106(7) 0.4800(6) 0.056(3) Uani 1 1 d . . . 
H16A H -0.2325 -0.1731 0.4841 0.068 Uiso 1 1 calc R . . 
C17 C -0.2066(8) -0.0711(7) 0.5084(6) 0.055(3) Uani 1 1 d . . . 
C18 C -0.2374(8) 0.0244(8) 0.5025(6) 0.058(3) Uani 1 1 d . . . 
C19 C -0.3102(8) 0.0760(7) 0.4663(6) 0.056(3) Uani 1 1 d . . . 
H19A H -0.3282 0.1386 0.4606 0.067 Uiso 1 1 calc R . . 
C20 C -0.3547(7) 0.0326(7) 0.4394(6) 0.050(3) Uani 1 1 d . . . 
C21 C -0.4786(7) 0.0516(7) 0.3779(6) 0.050(3) Uani 1 1 d . . . 
C22 C -0.5493(8) 0.1116(7) 0.3474(6) 0.058(3) Uani 1 1 d . . . 
H22A H -0.5622 0.1728 0.3479 0.070 Uiso 1 1 calc R . . 
C23 C -0.6028(9) 0.0821(7) 0.3154(6) 0.061(3) Uani 1 1 d . . . 
C24 C -0.5787(8) -0.0127(7) 0.3116(6) 0.059(3) Uani 1 1 d . . . 
C25 C -0.5070(8) -0.0704(7) 0.3444(6) 0.055(3) Uani 1 1 d . . . 
H25A H -0.4927 -0.1316 0.3434 0.066 Uiso 1 1 calc R . . 
C26 C -0.4531(7) -0.0423(6) 0.3800(5) 0.046(2) Uani 1 1 d . . . 
C27 C -0.1247(8) -0.1288(8) 0.5440(7) 0.079(4) Uani 1 1 d . . . 
H27A H -0.1153 -0.1910 0.5424 0.119 Uiso 1 1 calc R . . 
H27B H -0.1411 -0.1210 0.5969 0.119 Uiso 1 1 calc R . . 
H27C H -0.0658 -0.1109 0.5152 0.119 Uiso 1 1 calc R . . 
C28 C -0.6364(10) -0.0444(7) 0.2766(8) 0.087(4) Uani 1 1 d . . . 
H28A H -0.6122 -0.1085 0.2784 0.131 Uiso 1 1 calc R . . 
H28B H -0.6301 -0.0147 0.2237 0.131 Uiso 1 1 calc R . . 
H28C H -0.7037 -0.0304 0.3055 0.131 Uiso 1 1 calc R . . 
C33 C -0.1980(8) 0.0987(8) 0.2628(6) 0.061(3) Uani 1 1 d . . . 
H33A H -0.1634 0.0882 0.2989 0.073 Uiso 1 1 calc R . . 
C34 C -0.2812(10) 0.1708(8) 0.2660(7) 0.071(3) Uani 1 1 d . . . 
H34A H -0.3002 0.2084 0.3023 0.086 Uiso 1 1 calc R . . 
C35 C -0.3340(10) 0.1853(8) 0.2151(8) 0.079(4) Uani 1 1 d . . . 
H35A H -0.3906 0.2319 0.2165 0.095 Uiso 1 1 calc R . . 
C36 C -0.3010(11) 0.1287(8) 0.1613(7) 0.085(4) Uani 1 1 d . . . 
H36A H -0.3355 0.1369 0.1256 0.102 Uiso 1 1 calc R . . 
C37 C -0.2171(9) 0.0602(7) 0.1605(6) 0.062(3) Uani 1 1 d . . . 
C38 C -0.1794(9) 0.0000(7) 0.1012(6) 0.066(3) Uani 1 1 d . . . 
H38A H -0.2148 0.0047 0.0669 0.079 Uiso 1 1 calc R . . 
C39 C 0.0238(9) -0.1744(7) 0.0411(6) 0.062(3) Uani 1 1 d . . . 
C40 C 0.0543(7) -0.2306(6) -0.0219(5) 0.048(3) Uani 1 1 d . . . 
C41 C 0.0323(8) -0.1948(7) -0.0932(6) 0.057(3) Uani 1 1 d . . . 
H41A H -0.0055 -0.1359 -0.1022 0.069 Uiso 1 1 calc R . . 
C42 C 0.0666(9) -0.2466(8) -0.1492(6) 0.071(3) Uani 1 1 d . . . 
H42A H 0.0529 -0.2216 -0.1968 0.085 Uiso 1 1 calc R . . 
C43 C 0.1207(8) -0.3346(8) -0.1385(6) 0.068(3) Uani 1 1 d . . . 
H43A H 0.1411 -0.3693 -0.1772 0.082 Uiso 1 1 calc R . . 
C44 C 0.1445(8) -0.3708(7) -0.0675(6) 0.064(3) Uani 1 1 d . . . 
H44A H 0.1838 -0.4291 -0.0596 0.077 Uiso 1 1 calc R . . 
C45 C 0.1087(8) -0.3186(7) -0.0091(6) 0.053(3) Uani 1 1 d . . . 
C46 C 0.1380(8) -0.3673(6) 0.0667(5) 0.046(3) Uani 1 1 d . . . 
C47 C 0.2302(8) -0.3810(6) 0.0707(6) 0.052(3) Uani 1 1 d . . . 
C48 C 0.3055(9) -0.3488(7) 0.0126(6) 0.062(3) Uani 1 1 d . . . 
H48A H 0.2906 -0.3131 -0.0324 0.074 Uiso 1 1 calc R . . 
C49 C 0.3959(9) -0.3652(7) 0.0171(6) 0.063(3) Uani 1 1 d . . . 
C50 C 0.4234(10) -0.4243(7) 0.0874(7) 0.068(3) Uani 1 1 d . . . 
C51 C 0.3481(9) -0.4556(7) 0.1466(6) 0.067(3) Uani 1 1 d . . . 
H51A H 0.3615 -0.4908 0.1923 0.080 Uiso 1 1 calc R . . 
C52 C 0.2572(9) -0.4358(6) 0.1390(6) 0.053(3) Uani 1 1 d . . . 
C53 C 0.0980(9) -0.4561(7) 0.1954(6) 0.055(3) Uani 1 1 d . . . 
C54 C 0.0374(9) -0.4969(7) 0.2570(6) 0.064(3) Uani 1 1 d . . . 
H54A H 0.0583 -0.5282 0.3009 0.076 Uiso 1 1 calc R . . 
C55 C -0.0528(9) -0.4921(7) 0.2547(6) 0.061(3) Uani 1 1 d . . . 
C56 C -0.0903(8) -0.4334(7) 0.1900(6) 0.055(3) Uani 1 1 d . . . 
C57 C -0.0322(8) -0.3928(7) 0.1309(6) 0.057(3) Uani 1 1 d . . . 
H57A H -0.0561 -0.3570 0.0896 0.068 Uiso 1 1 calc R . . 
C58 C 0.0659(8) -0.4024(6) 0.1287(5) 0.049(3) Uani 1 1 d . . . 
C59 C 0.4765(9) -0.3305(8) -0.0468(7) 0.090(4) Uani 1 1 d . . . 
H59A H 0.4508 -0.2932 -0.0889 0.136 Uiso 1 1 calc R . . 
H59B H 0.5280 -0.3807 -0.0652 0.136 Uiso 1 1 calc R . . 
H59C H 0.5015 -0.2958 -0.0266 0.136 Uiso 1 1 calc R . . 
C60 C -0.1970(8) -0.4226(8) 0.1922(6) 0.077(4) Uani 1 1 d . . . 
H60A H -0.2113 -0.3824 0.1465 0.116 Uiso 1 1 calc R . . 
H60B H -0.2401 -0.3982 0.2374 0.116 Uiso 1 1 calc R . . 
H60C H -0.2058 -0.4804 0.1939 0.116 Uiso 1 1 calc R . . 
C67 C 0.8762(12) -0.3585(12) -0.0898(11) 0.144(7) Uani 1 1 d . . . 
C68 C 0.7766(16) -0.3905(11) -0.0420(10) 0.113(6) Uani 1 1 d . . . 
C65 C -0.5675(13) -0.4265(10) 0.4129(10) 0.132(6) Uani 1 1 d . . . 
C66 C -0.5468(14) -0.3516(13) 0.3618(11) 0.123(6) Uani 1 1 d . . . 
N1 N 0.1176(7) -0.1369(6) 0.2042(5) 0.067(3) Uani 1 1 d . . . 
N2 N -0.0213(7) -0.2216(5) 0.2873(5) 0.053(2) Uani 1 1 d . . . 
N3 N -0.0965(6) -0.2551(5) 0.3319(5) 0.058(2) Uani 1 1 d . . . 
H3C H -0.0872 -0.3055 0.3633 0.069 Uiso 1 1 calc R . . 
N4 N -0.1886(7) 0.0643(7) 0.5290(6) 0.080(3) Uani 1 1 d . . . 
H4B H -0.1418 0.0309 0.5486 0.096 Uiso 1 1 calc R . . 
N5 N -0.6785(8) 0.1383(6) 0.2884(6) 0.090(3) Uani 1 1 d . . . 
H5A H -0.7081 0.1154 0.2690 0.109 Uiso 1 1 calc R . . 
N6 N -0.1657(7) 0.0439(6) 0.2107(5) 0.057(2) Uani 1 1 d . . . 
N7 N -0.1000(7) -0.0563(6) 0.0987(5) 0.063(3) Uani 1 1 d . . . 
N8 N -0.0620(8) -0.1120(6) 0.0421(5) 0.081(3) Uani 1 1 d . . . 
H8A H -0.0928 -0.1065 0.0088 0.097 Uiso 1 1 calc R . . 
N16 N -0.5275(16) -0.2896(10) 0.3198(11) 0.175(8) Uani 1 1 d . . . 
N10 N -0.1168(7) -0.5365(6) 0.3133(5) 0.075(3) Uani 1 1 d . . . 
H10B H -0.1759 -0.5254 0.3113 0.090 Uiso 1 1 calc R . . 
N14 N 0.2147(13) -0.5128(11) 0.3870(8) 0.101(4) Uani 1 1 d . . . 
N15 N 0.0218(9) 0.0109(8) 0.3208(8) 0.085(3) Uani 1 1 d . . . 
N11 N -0.3178(11) -0.6309(9) 0.3629(8) 0.093(4) Uani 1 1 d . . . 
N13 N 0.7069(11) -0.4087(11) -0.0102(12) 0.153(7) Uani 1 1 d . . . 
N9 N 0.5145(8) -0.4454(7) 0.0900(7) 0.096(4) Uani 1 1 d . . . 
H9B H 0.5538 -0.4189 0.0530 0.115 Uiso 1 1 calc R . . 
N12 N -0.2310(14) -0.1487(15) -0.0191(10) 0.140(6) Uani 1 1 d . . . 
O1 O -0.2031(5) -0.1382(4) 0.2827(4) 0.065(2) Uani 1 1 d . . . 
O2 O -0.4272(5) 0.0869(4) 0.4076(4) 0.0571(18) Uani 1 1 d . . . 
O3 O 0.0710(6) -0.1837(6) 0.0845(5) 0.096(3) Uani 1 1 d . . . 
O4 O 0.1901(6) -0.4686(5) 0.1990(4) 0.063(2) Uani 1 1 d . . . 
O5 O 0.1618(12) -0.4443(10) 0.4041(9) 0.186(7) Uani 1 1 d . . . 
O6 O 0.1870(11) -0.5815(10) 0.4033(7) 0.163(5) Uani 1 1 d . . . 
O7 O 0.2948(10) -0.5126(9) 0.3459(7) 0.144(5) Uani 1 1 d . . . 
O8 O 0.0607(11) 0.0304(7) 0.3606(8) 0.173(6) Uani 1 1 d . . . 
O9 O -0.0311(8) -0.0430(6) 0.3482(5) 0.100(3) Uani 1 1 d . . . 
O13 O -0.3187(13) -0.5654(10) 0.3775(13) 0.229(9) Uani 1 1 d . . . 
O11 O -0.3810(8) -0.6737(8) 0.3939(7) 0.129(4) Uani 1 1 d . . . 
O19 O -0.8149(8) 0.1368(7) 0.2117(6) 0.129(4) Uani 1 1 d . . . 
O18 O -0.5307(7) -0.6646(6) 0.3134(6) 0.118(3) Uani 1 1 d . . . 
O17 O -0.0443(7) -0.3867(7) 0.4544(6) 0.132(4) Uani 1 1 d . . . 
O16 O -0.2807(14) -0.1694(12) -0.0487(12) 0.258(10) Uani 1 1 d . . . 
O15 O -0.1987(13) -0.2129(11) 0.0363(12) 0.211(7) Uani 1 1 d . . . 
O14 O -0.2061(12) -0.0878(9) -0.0368(9) 0.161(7) Uani 1 1 d . . . 
O12 O -0.2459(14) -0.6562(15) 0.3170(9) 0.248(10) Uani 1 1 d . . . 
O10 O 0.0312(7) 0.0516(5) 0.2519(6) 0.089(3) Uani 1 1 d . . . 
C31 C -0.7146(11) 0.2391(9) 0.2901(9) 0.104(5) Uani 1 1 d D . . 
H31A H -0.7842 0.2592 0.2958 0.125 Uiso 1 1 calc R . . 
H31B H -0.7020 0.2520 0.3337 0.125 Uiso 1 1 calc R . . 
C32 C -0.6632(14) 0.2859(10) 0.2175(10) 0.156(8) Uani 1 1 d D . . 
H32A H -0.6839 0.3496 0.2180 0.234 Uiso 1 1 calc R . . 
H32B H -0.6776 0.2742 0.1749 0.234 Uiso 1 1 calc R . . 
H32C H -0.5943 0.2648 0.2119 0.234 Uiso 1 1 calc R . . 
C29 C -0.2149(13) 0.1650(9) 0.5248(10) 0.123(6) Uani 1 1 d . . . 
H29A H -0.1943 0.1934 0.4712 0.147 Uiso 1 1 calc R . . 
H29B H -0.2852 0.1870 0.5427 0.147 Uiso 1 1 calc R . . 
C30 C -0.1700(13) 0.1916(10) 0.5716(11) 0.145(7) Uani 1 1 d . . . 
H30A H -0.1899 0.2561 0.5677 0.218 Uiso 1 1 calc R . . 
H30B H -0.1004 0.1721 0.5530 0.218 Uiso 1 1 calc R . . 
H30C H -0.1905 0.1641 0.6249 0.218 Uiso 1 1 calc R . . 
C63 C -0.0854(11) -0.6025(10) 0.3790(8) 0.113(6) Uani 1 1 d . . . 
H63A H -0.0416 -0.5818 0.3946 0.135 Uiso 1 1 calc R . . 
H63B H -0.1417 -0.6073 0.4230 0.135 Uiso 1 1 calc R . . 
C64 C -0.0368(14) -0.6895(12) 0.3566(12) 0.214(12) Uani 1 1 d . . . 
H64A H -0.0156 -0.7312 0.3992 0.320 Uiso 1 1 calc R . . 
H64B H 0.0187 -0.6846 0.3129 0.320 Uiso 1 1 calc R . . 
H64C H -0.0809 -0.7108 0.3429 0.320 Uiso 1 1 calc R . . 
C61 C 0.5551(13) -0.5126(13) 0.1528(10) 0.141(7) Uani 1 1 d D . . 
H61A H 0.5208 -0.5596 0.1742 0.169 Uiso 1 1 calc R . . 
H61B H 0.6239 -0.5401 0.1327 0.169 Uiso 1 1 calc R . . 
C62 C 0.540(2) -0.4608(13) 0.2106(15) 0.261(18) Uani 1 1 d D . . 
H62A H 0.5632 -0.4998 0.2534 0.392 Uiso 1 1 calc R . . 
H62B H 0.4720 -0.4326 0.2286 0.392 Uiso 1 1 calc R . . 
H62C H 0.5754 -0.4152 0.1885 0.392 Uiso 1 1 calc R . . 
 
loop_ 
 _atom_site_aniso_label 
 _atom_site_aniso_U_11 
 _atom_site_aniso_U_22 
 _atom_site_aniso_U_33 
 _atom_site_aniso_U_23 
 _atom_site_aniso_U_13 
 _atom_site_aniso_U_12 
Hg1 0.0699(3) 0.0573(3) 0.0545(3) -0.00395(19) -0.0219(2) -0.0153(2) 
C1 0.076(10) 0.076(8) 0.074(9) 0.002(7) -0.024(7) -0.021(8) 
C2 0.070(11) 0.109(11) 0.075(10) -0.007(8) -0.006(7) -0.038(9) 
C3 0.060(9) 0.123(12) 0.086(11) -0.036(9) -0.009(8) -0.028(9) 
C4 0.096(12) 0.086(9) 0.069(9) -0.014(7) -0.033(8) -0.018(9) 
C5 0.051(8) 0.064(8) 0.040(7) -0.007(6) -0.009(6) -0.019(7) 
C6 0.071(9) 0.070(8) 0.043(7) -0.009(6) -0.018(6) -0.004(7) 
C7 0.072(9) 0.032(6) 0.048(7) -0.002(5) -0.010(6) -0.018(6) 
C8 0.073(8) 0.039(6) 0.040(6) -0.006(5) -0.018(6) -0.008(6) 
C9 0.103(10) 0.062(8) 0.053(8) -0.016(6) -0.012(7) -0.023(8) 
C10 0.082(9) 0.045(7) 0.057(8) -0.002(6) 0.005(7) -0.027(7) 
C11 0.081(10) 0.071(9) 0.063(8) -0.009(7) -0.009(7) -0.036(8) 
C12 0.065(8) 0.061(7) 0.060(8) -0.017(6) -0.015(6) -0.016(7) 
C13 0.063(8) 0.044(6) 0.037(6) -0.003(5) -0.008(5) -0.021(6) 
C14 0.052(7) 0.052(6) 0.041(6) -0.011(5) -0.001(5) -0.018(6) 
C15 0.058(7) 0.052(7) 0.034(6) -0.010(5) -0.007(5) -0.016(6) 
C16 0.060(8) 0.055(7) 0.043(7) -0.003(5) -0.008(6) -0.011(6) 
C17 0.059(8) 0.065(7) 0.046(7) -0.014(5) -0.015(5) -0.019(6) 
C18 0.059(8) 0.080(8) 0.045(7) -0.020(6) -0.008(6) -0.033(7) 
C19 0.055(8) 0.072(7) 0.047(7) -0.014(6) -0.017(6) -0.019(6) 
C20 0.049(7) 0.052(7) 0.043(6) -0.004(5) -0.017(5) -0.003(6) 
C21 0.051(7) 0.053(7) 0.055(7) -0.017(5) -0.017(5) -0.015(6) 
C22 0.064(8) 0.046(6) 0.065(8) 0.003(6) -0.027(6) -0.016(6) 
C23 0.078(9) 0.062(8) 0.051(7) -0.006(6) -0.031(6) -0.019(7) 
C24 0.066(8) 0.061(7) 0.058(7) -0.005(6) -0.027(6) -0.021(7) 
C25 0.060(8) 0.052(6) 0.055(7) -0.011(5) -0.017(6) -0.015(6) 
C26 0.052(7) 0.046(6) 0.036(6) -0.001(5) -0.007(5) -0.015(5) 
C27 0.072(9) 0.097(9) 0.074(9) -0.025(7) -0.037(7) -0.002(7) 
C28 0.120(12) 0.076(8) 0.097(11) -0.014(7) -0.066(9) -0.031(8) 
C33 0.069(9) 0.067(8) 0.047(7) -0.007(6) -0.014(6) -0.021(7) 
C34 0.092(10) 0.061(8) 0.054(8) -0.021(6) -0.007(7) -0.014(8) 
C35 0.084(10) 0.062(8) 0.070(9) -0.018(7) -0.008(8) 0.003(7) 
C36 0.117(12) 0.073(9) 0.071(9) -0.028(7) -0.054(8) 0.009(9) 
C37 0.077(9) 0.060(7) 0.041(7) -0.015(6) -0.009(6) -0.009(7) 
C38 0.062(9) 0.071(8) 0.061(8) -0.016(6) -0.031(6) 0.006(7) 
C39 0.080(9) 0.053(7) 0.048(7) -0.015(6) -0.025(6) -0.001(7) 
C40 0.062(7) 0.045(6) 0.033(6) -0.015(5) -0.016(5) -0.001(5) 
C41 0.080(8) 0.050(6) 0.042(7) -0.010(5) -0.025(6) -0.008(6) 
C42 0.088(9) 0.075(8) 0.034(7) 0.002(6) -0.014(6) -0.014(7) 
C43 0.088(9) 0.067(8) 0.043(7) -0.017(6) -0.014(6) -0.008(7) 
C44 0.088(9) 0.053(7) 0.047(7) -0.024(6) -0.018(6) 0.000(6) 
C45 0.069(8) 0.050(6) 0.038(6) -0.011(5) -0.008(5) -0.017(6) 
C46 0.064(8) 0.040(6) 0.029(6) -0.009(4) -0.013(5) -0.006(5) 
C47 0.058(8) 0.056(7) 0.039(6) -0.001(5) -0.020(6) -0.011(6) 
C48 0.068(9) 0.063(7) 0.050(7) 0.004(6) -0.027(6) -0.011(7) 
C49 0.075(9) 0.061(7) 0.047(7) 0.001(6) -0.017(6) -0.015(7) 
C50 0.070(9) 0.075(8) 0.067(9) 0.001(6) -0.033(7) -0.025(7) 
C51 0.084(10) 0.082(8) 0.040(7) 0.008(6) -0.021(7) -0.038(8) 
C52 0.069(8) 0.053(6) 0.043(7) -0.005(5) -0.022(6) -0.021(6) 
C53 0.069(8) 0.059(7) 0.039(7) 0.000(5) -0.017(6) -0.021(6) 
C54 0.061(8) 0.078(8) 0.044(7) -0.008(6) -0.009(6) -0.017(7) 
C55 0.065(9) 0.056(7) 0.053(8) -0.014(6) -0.007(6) -0.011(6) 
C56 0.055(8) 0.061(7) 0.051(7) -0.012(6) -0.017(6) -0.011(6) 
C57 0.048(7) 0.072(7) 0.043(7) -0.010(6) -0.006(5) -0.011(6) 
C58 0.060(8) 0.050(6) 0.034(6) -0.012(5) -0.010(5) -0.009(6) 
C59 0.088(10) 0.093(9) 0.072(9) 0.022(7) -0.019(8) -0.031(8) 
C60 0.080(10) 0.086(8) 0.051(7) -0.013(6) -0.019(6) 0.000(7) 
C67 0.093(12) 0.180(17) 0.163(18) -0.065(14) 0.023(11) -0.072(13) 
C68 0.152(18) 0.085(11) 0.083(12) -0.018(9) -0.058(12) 0.023(12) 
C65 0.185(18) 0.103(11) 0.113(14) 0.022(11) -0.048(13) -0.070(12) 
C66 0.170(18) 0.109(14) 0.117(16) -0.011(12) -0.074(14) -0.041(14) 
N1 0.096(8) 0.077(7) 0.044(6) -0.009(5) -0.019(6) -0.045(6) 
N2 0.059(6) 0.056(5) 0.042(5) -0.005(4) -0.010(5) -0.019(5) 
N3 0.048(6) 0.053(5) 0.051(6) 0.013(4) 0.002(4) -0.019(5) 
N4 0.090(8) 0.082(7) 0.086(8) -0.019(6) -0.052(6) -0.014(6) 
N5 0.129(10) 0.064(7) 0.087(8) 0.008(6) -0.067(7) -0.015(7) 
N6 0.093(7) 0.068(6) 0.023(5) 0.005(4) -0.011(5) -0.050(6) 
N7 0.074(7) 0.064(6) 0.050(6) -0.022(5) -0.029(5) 0.008(6) 
N8 0.128(10) 0.064(6) 0.047(6) -0.020(5) -0.042(6) 0.006(7) 
N16 0.30(2) 0.110(11) 0.165(18) 0.003(11) -0.133(17) -0.060(14) 
N10 0.080(7) 0.078(6) 0.050(6) 0.011(5) -0.009(5) -0.024(6) 
N14 0.108(13) 0.110(12) 0.068(10) 0.023(9) -0.034(9) -0.027(11) 
N15 0.114(10) 0.079(8) 0.090(10) -0.019(7) -0.059(8) -0.026(7) 
N11 0.107(11) 0.111(10) 0.080(9) -0.046(8) -0.013(8) -0.044(9) 
N13 0.090(12) 0.139(13) 0.196(19) 0.012(11) -0.012(11) -0.043(10) 
N9 0.086(9) 0.119(9) 0.092(9) 0.019(7) -0.045(7) -0.047(8) 
N12 0.169(17) 0.19(2) 0.091(12) -0.028(13) -0.056(11) -0.064(16) 
O1 0.078(6) 0.046(4) 0.056(5) 0.000(4) -0.010(4) -0.014(4) 
O2 0.067(5) 0.056(4) 0.057(5) -0.013(4) -0.023(4) -0.018(4) 
O3 0.101(7) 0.109(7) 0.091(7) -0.062(5) -0.058(6) 0.026(5) 
O4 0.076(6) 0.077(5) 0.036(4) 0.008(4) -0.016(4) -0.033(5) 
O5 0.201(16) 0.142(11) 0.158(13) -0.029(10) -0.065(11) 0.052(11) 
O6 0.254(17) 0.170(12) 0.082(9) -0.004(8) -0.034(9) -0.103(12) 
O7 0.113(10) 0.235(15) 0.077(8) -0.025(8) -0.012(7) -0.051(10) 
O8 0.263(16) 0.154(10) 0.191(13) -0.012(9) -0.173(13) -0.069(10) 
O9 0.159(9) 0.099(7) 0.056(6) -0.005(5) -0.039(6) -0.049(7) 
O13 0.240(19) 0.144(12) 0.37(3) -0.127(15) -0.130(17) -0.027(12) 
O11 0.115(9) 0.144(9) 0.131(10) -0.052(7) 0.017(7) -0.068(8) 
O19 0.131(9) 0.157(9) 0.135(10) 0.015(7) -0.084(8) -0.067(8) 
O18 0.129(9) 0.111(7) 0.107(8) -0.033(6) -0.017(6) -0.027(7) 
O17 0.087(7) 0.147(8) 0.106(8) 0.058(7) -0.029(6) -0.018(6) 
O16 0.29(2) 0.32(2) 0.30(2) -0.068(18) -0.18(2) -0.132(18) 
O15 0.234(18) 0.211(15) 0.215(19) 0.023(14) -0.089(15) -0.110(14) 
O14 0.230(16) 0.132(11) 0.152(13) 0.004(9) -0.050(11) -0.111(11) 
O12 0.251(18) 0.40(3) 0.147(14) -0.157(16) 0.091(13) -0.223(19) 
O10 0.114(8) 0.090(6) 0.074(6) -0.014(5) -0.051(6) -0.013(5) 
C31 0.112(12) 0.089(10) 0.119(14) 0.003(9) -0.060(10) -0.022(10) 
C32 0.21(2) 0.120(13) 0.139(18) 0.037(12) -0.051(15) -0.090(14) 
C29 0.193(18) 0.101(11) 0.141(15) -0.010(10) -0.125(14) -0.052(12) 
C30 0.178(18) 0.112(12) 0.165(18) -0.070(12) -0.034(14) -0.040(13) 
C63 0.120(13) 0.132(13) 0.067(10) 0.050(9) -0.027(9) -0.058(11) 
C64 0.17(2) 0.116(14) 0.20(2) 0.069(15) -0.019(16) 0.067(14) 
C61 0.127(15) 0.20(2) 0.109(15) 0.008(14) -0.045(12) -0.081(15) 
C62 0.47(5) 0.19(2) 0.26(3) 0.09(2) -0.27(4) -0.18(3) 
 
_geom_special_details 
; 
 All esds (except the esd in the dihedral angle between two l.s. planes) 
 are estimated using the full covariance matrix.  The cell esds are taken 
 into account individually in the estimation of esds in distances, angles 
 and torsion angles; correlations between esds in cell parameters are only 
 used when they are defined by crystal symmetry.  An approximate (isotropic) 
 treatment of cell esds is used for estimating esds involving l.s. planes. 
; 
 
loop_ 
 _geom_bond_atom_site_label_1 
 _geom_bond_atom_site_label_2 
 _geom_bond_distance 
 _geom_bond_site_symmetry_2 
 _geom_bond_publ_flag 
Hg1 N6 2.200(9) . ? 
Hg1 N1 2.208(10) . ? 
Hg1 N2 2.399(8) . ? 
Hg1 N7 2.479(8) . ? 
C1 C2 1.383(15) . ? 
C1 N1 1.390(14) . ? 
C2 C3 1.404(16) . ? 
C3 C4 1.404(16) . ? 
C4 C5 1.368(15) . ? 
C5 N1 1.313(12) . ? 
C5 C6 1.408(14) . ? 
C6 N2 1.334(12) . ? 
C7 O1 1.212(10) . ? 
C7 N3 1.343(12) . ? 
C7 C8 1.515(14) . ? 
C8 C13 1.385(13) . ? 
C8 C9 1.404(13) . ? 
C9 C10 1.360(14) . ? 
C10 C11 1.350(15) . ? 
C11 C12 1.396(14) . ? 
C12 C13 1.384(13) . ? 
C13 C14 1.492(13) . ? 
C14 C26 1.391(12) . ? 
C14 C15 1.411(13) . ? 
C15 C20 1.423(13) . ? 
C15 C16 1.425(13) . ? 
C16 C17 1.357(13) . ? 
C17 C18 1.422(14) . ? 
C17 C27 1.514(13) . ? 
C18 N4 1.372(12) . ? 
C18 C19 1.396(13) . ? 
C19 C20 1.367(13) . ? 
C20 O2 1.357(10) . ? 
C21 C22 1.353(12) . ? 
C21 O2 1.390(11) . ? 
C21 C26 1.410(12) . ? 
C22 C23 1.388(13) . ? 
C23 N5 1.355(12) . ? 
C23 C24 1.446(14) . ? 
C24 C25 1.373(13) . ? 
C24 C28 1.501(13) . ? 
C25 C26 1.426(13) . ? 
C33 N6 1.333(13) . ? 
C33 C34 1.397(14) . ? 
C34 C35 1.355(15) . ? 
C35 C36 1.378(16) . ? 
C36 C37 1.375(15) . ? 
C37 N6 1.326(13) . ? 
C37 C38 1.494(15) . ? 
C38 N7 1.237(12) . ? 
C39 O3 1.192(12) . ? 
C39 N8 1.350(13) . ? 
C39 C40 1.515(14) . ? 
C40 C45 1.379(12) . ? 
C40 C41 1.400(12) . ? 
C41 C42 1.355(14) . ? 
C42 C43 1.374(14) . ? 
C43 C44 1.405(14) . ? 
C44 C45 1.393(13) . ? 
C45 C46 1.548(13) . ? 
C46 C47 1.358(13) . ? 
C46 C58 1.428(13) . ? 
C47 C48 1.408(14) . ? 
C47 C52 1.437(13) . ? 
C48 C49 1.328(14) . ? 
C49 C50 1.489(14) . ? 
C49 C59 1.523(15) . ? 
C50 N9 1.318(13) . ? 
C50 C51 1.412(15) . ? 
C51 C52 1.349(13) . ? 
C52 O4 1.350(12) . ? 
C53 O4 1.357(11) . ? 
C53 C54 1.366(13) . ? 
C53 C58 1.439(13) . ? 
C54 C55 1.350(14) . ? 
C55 N10 1.398(13) . ? 
C55 C56 1.468(14) . ? 
C56 C57 1.319(13) . ? 
C56 C60 1.548(14) . ? 
C57 C58 1.423(13) . ? 
C67 C68 1.63(2) . ? 
C68 N13 1.11(2) . ? 
C65 C66 1.37(2) . ? 
C66 N16 1.14(2) . ? 
N2 N3 1.336(10) . ? 
N4 C29 1.507(15) . ? 
N5 C31 1.522(15) . ? 
N7 N8 1.404(12) . ? 
N10 C63 1.485(14) . ? 
N14 O5 1.173(16) . ? 
N14 O7 1.194(15) . ? 
N14 O6 1.223(15) . ? 
N15 O8 1.225(12) . ? 
N15 O9 1.255(12) . ? 
N15 O10 1.257(13) . ? 
N11 O13 1.137(14) . ? 
N11 O12 1.160(17) . ? 
N11 O11 1.245(13) . ? 
N9 C61 1.508(17) . ? 
N12 O14 1.081(18) . ? 
N12 O16 1.223(17) . ? 
N12 O15 1.341(19) . ? 
C31 C32 1.457(17) . ? 
C29 C30 1.466(17) . ? 
C63 C64 1.44(2) . ? 
C61 C62 1.43(2) . ? 
 
loop_ 
 _geom_angle_atom_site_label_1 
 _geom_angle_atom_site_label_2 
 _geom_angle_atom_site_label_3 
 _geom_angle 
 _geom_angle_site_symmetry_1 
 _geom_angle_site_symmetry_3 
 _geom_angle_publ_flag 
N6 Hg1 N1 153.5(3) . . ? 
N6 Hg1 N2 131.4(3) . . ? 
N1 Hg1 N2 70.9(3) . . ? 
N6 Hg1 N7 69.5(3) . . ? 
N1 Hg1 N7 119.5(3) . . ? 
N2 Hg1 N7 112.7(3) . . ? 
C2 C1 N1 121.3(11) . . ? 
C1 C2 C3 120.9(12) . . ? 
C2 C3 C4 115.4(13) . . ? 
C5 C4 C3 121.0(12) . . ? 
N1 C5 C4 124.0(11) . . ? 
N1 C5 C6 116.8(11) . . ? 
C4 C5 C6 119.2(11) . . ? 
N2 C6 C5 120.1(10) . . ? 
O1 C7 N3 122.7(10) . . ? 
O1 C7 C8 122.8(11) . . ? 
N3 C7 C8 114.5(8) . . ? 
C13 C8 C9 119.8(10) . . ? 
C13 C8 C7 122.7(8) . . ? 
C9 C8 C7 117.5(10) . . ? 
C10 C9 C8 121.3(11) . . ? 
C11 C10 C9 119.3(10) . . ? 
C10 C11 C12 120.8(11) . . ? 
C13 C12 C11 120.9(11) . . ? 
C12 C13 C8 117.9(9) . . ? 
C12 C13 C14 118.6(10) . . ? 
C8 C13 C14 123.3(9) . . ? 
C26 C14 C15 119.9(9) . . ? 
C26 C14 C13 120.8(9) . . ? 
C15 C14 C13 119.2(9) . . ? 
C14 C15 C20 118.2(9) . . ? 
C14 C15 C16 127.4(9) . . ? 
C20 C15 C16 114.4(9) . . ? 
C17 C16 C15 124.3(10) . . ? 
C16 C17 C18 117.8(10) . . ? 
C16 C17 C27 119.7(10) . . ? 
C18 C17 C27 122.5(10) . . ? 
N4 C18 C19 121.2(10) . . ? 
N4 C18 C17 117.6(10) . . ? 
C19 C18 C17 121.1(10) . . ? 
C20 C19 C18 118.6(10) . . ? 
O2 C20 C19 115.3(9) . . ? 
O2 C20 C15 121.0(9) . . ? 
C19 C20 C15 123.7(9) . . ? 
C22 C21 O2 116.5(9) . . ? 
C22 C21 C26 124.5(9) . . ? 
O2 C21 C26 118.9(9) . . ? 
C21 C22 C23 120.1(10) . . ? 
N5 C23 C22 122.7(10) . . ? 
N5 C23 C24 118.1(10) . . ? 
C22 C23 C24 119.2(10) . . ? 
C25 C24 C23 117.8(9) . . ? 
C25 C24 C28 122.9(10) . . ? 
C23 C24 C28 119.1(10) . . ? 
C24 C25 C26 124.1(9) . . ? 
C14 C26 C21 120.6(9) . . ? 
C14 C26 C25 125.3(9) . . ? 
C21 C26 C25 114.1(9) . . ? 
N6 C33 C34 123.4(11) . . ? 
C35 C34 C33 118.9(11) . . ? 
C34 C35 C36 117.9(12) . . ? 
C37 C36 C35 120.0(12) . . ? 
N6 C37 C36 123.0(11) . . ? 
N6 C37 C38 116.6(11) . . ? 
C36 C37 C38 120.4(11) . . ? 
N7 C38 C37 118.3(10) . . ? 
O3 C39 N8 123.8(11) . . ? 
O3 C39 C40 123.6(11) . . ? 
N8 C39 C40 112.6(10) . . ? 
C45 C40 C41 119.4(9) . . ? 
C45 C40 C39 118.5(9) . . ? 
C41 C40 C39 122.0(9) . . ? 
C42 C41 C40 119.4(10) . . ? 
C41 C42 C43 122.8(10) . . ? 
C42 C43 C44 118.3(10) . . ? 
C45 C44 C43 119.5(10) . . ? 
C40 C45 C44 120.6(9) . . ? 
C40 C45 C46 125.1(9) . . ? 
C44 C45 C46 114.3(9) . . ? 
C47 C46 C58 122.7(9) . . ? 
C47 C46 C45 120.6(9) . . ? 
C58 C46 C45 116.5(9) . . ? 
C46 C47 C48 126.4(9) . . ? 
C46 C47 C52 118.5(10) . . ? 
C48 C47 C52 115.0(10) . . ? 
C49 C48 C47 125.2(10) . . ? 
C48 C49 C50 119.1(11) . . ? 
C48 C49 C59 124.4(10) . . ? 
C50 C49 C59 116.5(11) . . ? 
N9 C50 C51 124.5(11) . . ? 
N9 C50 C49 119.3(11) . . ? 
C51 C50 C49 116.2(11) . . ? 
C52 C51 C50 121.9(10) . . ? 
O4 C52 C51 117.6(9) . . ? 
O4 C52 C47 119.9(10) . . ? 
C51 C52 C47 122.5(11) . . ? 
O4 C53 C54 117.6(9) . . ? 
O4 C53 C58 121.1(9) . . ? 
C54 C53 C58 121.3(11) . . ? 
C55 C54 C53 120.3(11) . . ? 
C54 C55 N10 123.7(10) . . ? 
C54 C55 C56 119.7(11) . . ? 
N10 C55 C56 116.5(10) . . ? 
C57 C56 C55 119.6(10) . . ? 
C57 C56 C60 121.6(10) . . ? 
C55 C56 C60 118.7(10) . . ? 
C56 C57 C58 121.9(10) . . ? 
C57 C58 C46 127.6(9) . . ? 
C57 C58 C53 116.7(10) . . ? 
C46 C58 C53 115.6(10) . . ? 
N13 C68 C67 177(2) . . ? 
N16 C66 C65 178(2) . . ? 
C5 N1 C1 117.2(11) . . ? 
C5 N1 Hg1 120.4(8) . . ? 
C1 N1 Hg1 121.9(8) . . ? 
C6 N2 N3 124.2(9) . . ? 
C6 N2 Hg1 111.2(7) . . ? 
N3 N2 Hg1 123.9(7) . . ? 
N2 N3 C7 119.1(8) . . ? 
C18 N4 C29 121.9(9) . . ? 
C23 N5 C31 124.5(10) . . ? 
C37 N6 C33 116.8(10) . . ? 
C37 N6 Hg1 121.1(8) . . ? 
C33 N6 Hg1 122.1(7) . . ? 
C38 N7 N8 119.3(9) . . ? 
C38 N7 Hg1 113.3(7) . . ? 
N8 N7 Hg1 126.7(7) . . ? 
C39 N8 N7 118.6(9) . . ? 
C55 N10 C63 121.5(10) . . ? 
O5 N14 O7 118.4(18) . . ? 
O5 N14 O6 121.7(19) . . ? 
O7 N14 O6 119(2) . . ? 
O8 N15 O9 122.1(13) . . ? 
O8 N15 O10 117.7(13) . . ? 
O9 N15 O10 120.0(11) . . ? 
O13 N11 O12 110.3(18) . . ? 
O13 N11 O11 126.2(18) . . ? 
O12 N11 O11 123.4(15) . . ? 
C50 N9 C61 125.0(12) . . ? 
O14 N12 O16 127(2) . . ? 
O14 N12 O15 118.6(19) . . ? 
O16 N12 O15 115(2) . . ? 
C20 O2 C21 121.3(8) . . ? 
C52 O4 C53 122.0(8) . . ? 
C32 C31 N5 108.2(13) . . ? 
C30 C29 N4 112.8(11) . . ? 
C64 C63 N10 110.3(14) . . ? 
C62 C61 N9 104.8(16) . . ? 
 
_diffrn_measured_fraction_theta_max    0.983 
_diffrn_reflns_theta_full              25.00 
_diffrn_measured_fraction_theta_full   0.983 
_refine_diff_density_max    1.326 
_refine_diff_density_min   -1.939 
_refine_diff_density_rms    0.146 
